# Supplementary material
Source: publisher site journal article supplement (https://www.dovepress.com/article/254885)
Supplement: Supplementary file 1 [file get_supplementary_file.php]

Supplementary Material


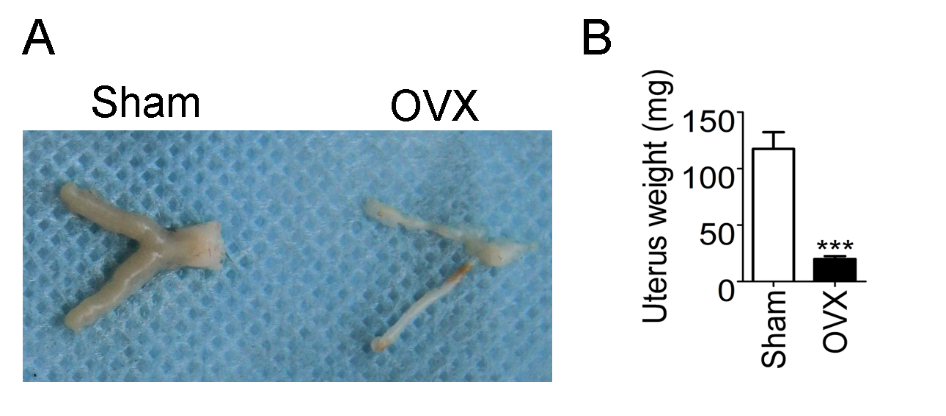


Figure S1. Ovariectomy significantly decreased the uterine weight of mice. (a) Representitive photo of atrophic uterine of OVX mice. (b) Decreased uterus weight in OVX mice. n=5 per group. Data are shown as mean ± s.d. ***P < 0.001 (Student’s t-test).


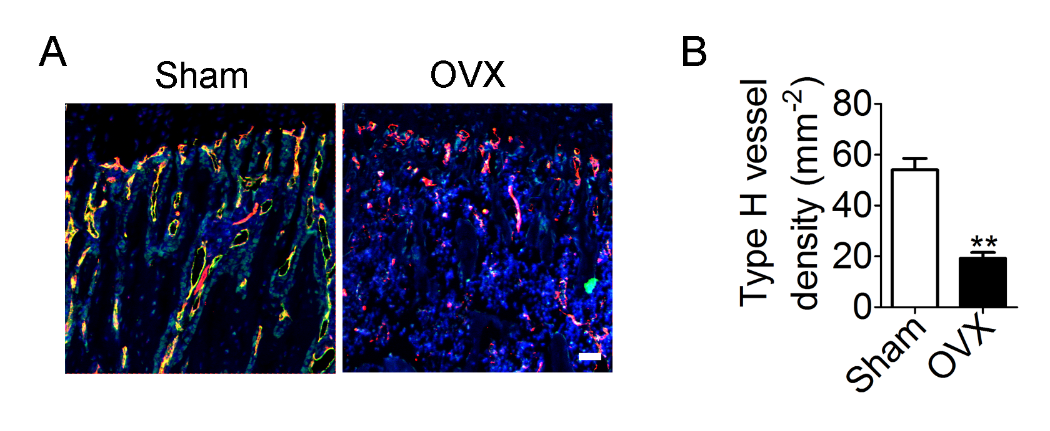


Figure S2. Representative confocal images of microvessels immunostained by CD31(Red) and EMCN(Green) (a) and quantitative analysis of type H microvessel density (b) in tibia sections of sham-operated (Sham) and ovariectomized (OVX) mice. Scale bar, 100 μm. n=9 per group. Data are shown as mean ± s.d. **P < 0.01 (Student’s t-test).


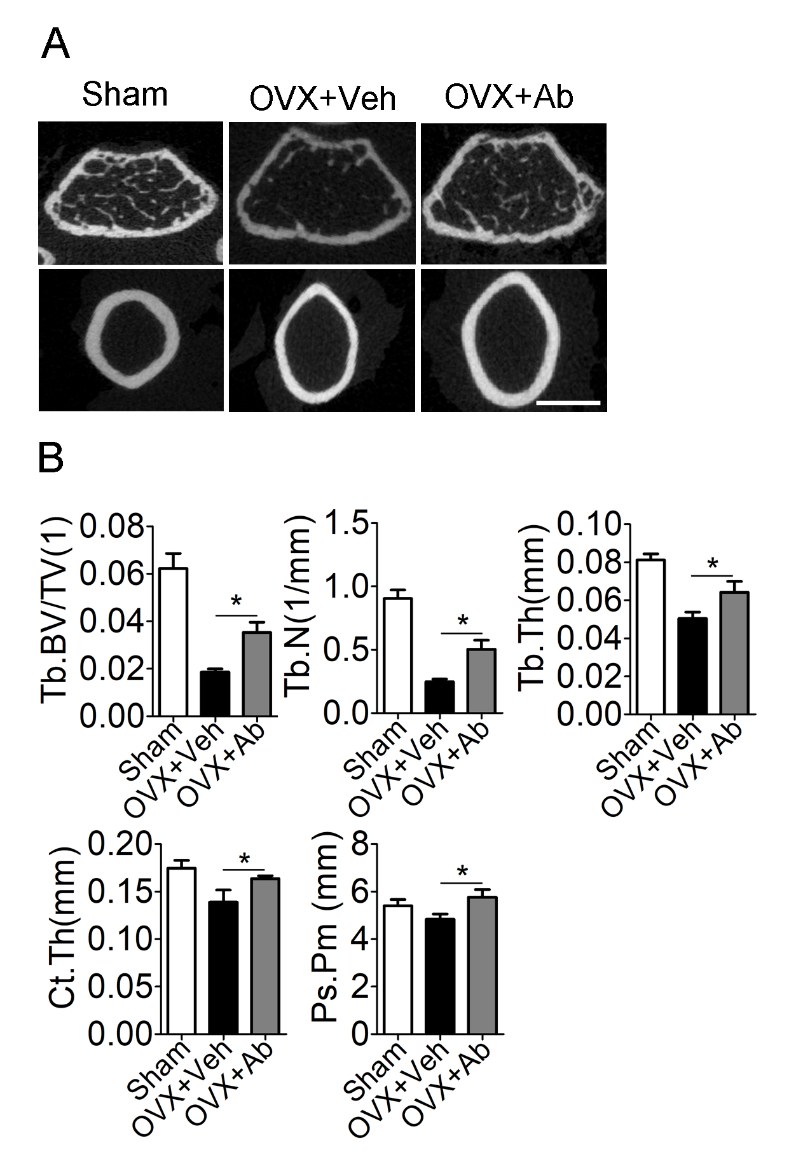


Figure S3. Neutralization of endogenous Cxcl9 caused regain of bone mass in OVX mice. (a) Representative micro-computed tomography (µCT) images of metaphyseal trabecular bone and cortical bone in the distal femur of OVX mice treated with vehicle (OVX+Veh) or Cxcl9–neutralizing antibody (1μg/50 μl) (OVX+Ab) every other day for 2 months with the first injection at the day of 2 months after OVX (when bone loss has occurred). Scale bar, 1 mm. (b) Quantitative µCT analysis of the trabecular bone fraction (Tb. BV/TV), trabecular number (Tb.N), trabecular thickness (Tb.Th), cortical bone thickness (Ct. Th) and periosteal perimeter (Ps. Pm) of femora. n=5 per group. Data are shown as mean ± s.d. *P < 0.05 (Student’s t-test).


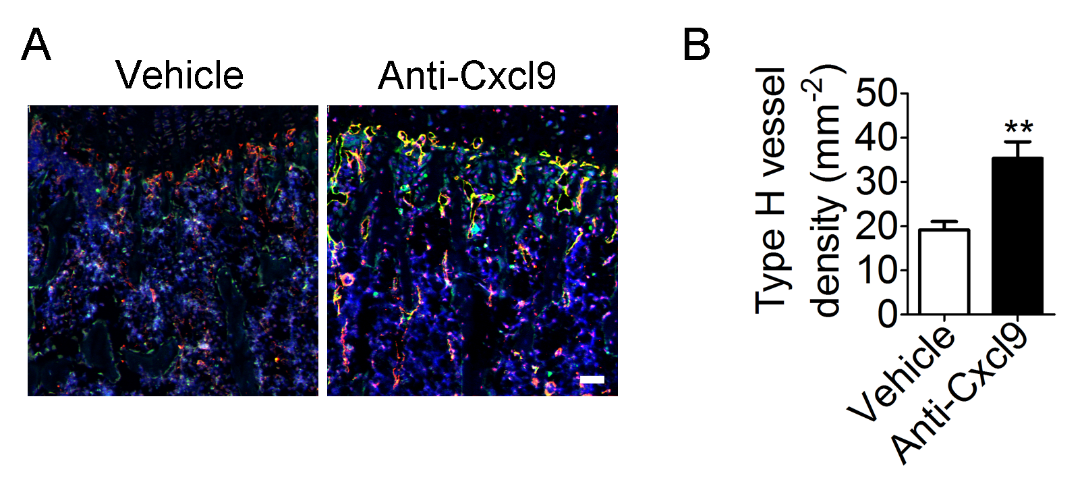
Figure S4. Representative confocal images of microvessels immunostained by CD31(Red) and EMCN(Green) (a) and quantitative analysis of type H microvessel density (b) in tibia sections of OVX mice treated with vehicle or Cxcl9–neutralizing antibody with the first injection at the same day of OVX. Scale bar, 100 μm. n=9 per group. Data are shown as mean ± s.d. **P < 0.01 (Student’s t-test).


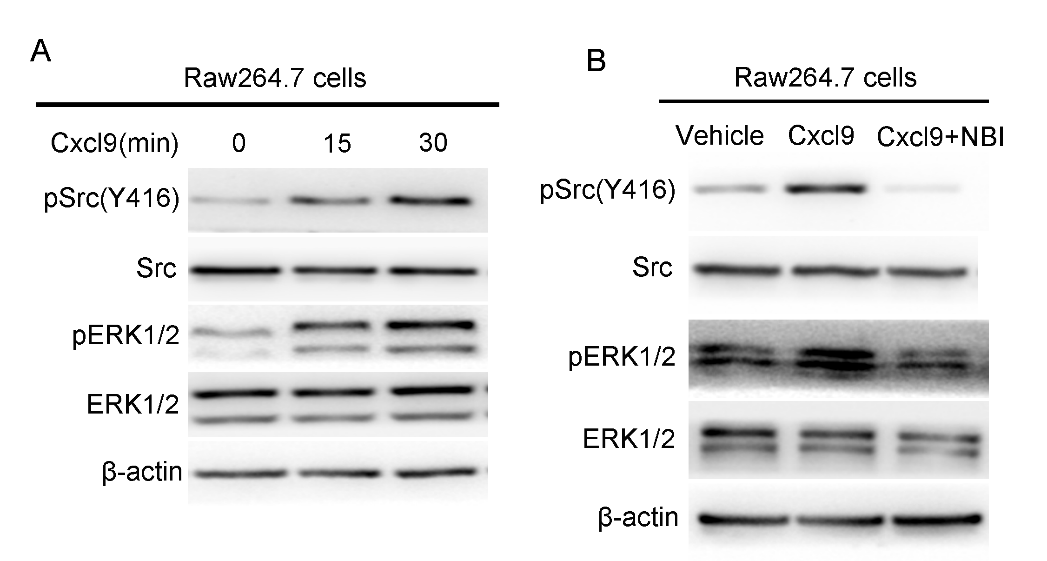


Figure S5. Cxcl9 activates CXCR3/ERK signaling in Raw264.7 cells. (a) Serum-starved Raw264.7 cells were incubated with 100 ng/ml Cxcl9 for the indicated time points. Total cell lysates were immunoblotted with antibodies specifically recognizing the phosphorylated form of Src and ERK. (b) Serum-starved Raw264.7 cells were incubated with Cxcl9 (100 ng/ml) or Cxcl9 plus NBI-74330 (CXCR3 antagonist) as indicated for 10 min. Total cell lysates were immunoblotted with antibodies specifically recognizing the phosphorylated form of Src and ERK.
